# Supplementary material
Source: PubMed Central journal article supplement (PMC7912776)
Supplement: NIHMS1672728-supplement-The_supplement.pdf [file NIHMS1672728-supplement-The_supplement.pdf]

In the format provided by the authors and unedited.

# Genetics of extreme human longevity to guide drug discovery for healthy ageing

Zhengdong D. Zhang <sup>1</sup>✉, Sofiya Milman<sup>1,2</sup>, Jhih-Rong Lin<sup>1</sup>, Shayne Wierbowski<sup>3</sup>, Haiyuan Yu<sup>3</sup>, Nir Barzilai<sup>1,2</sup>, Vera Gorbunova<sup>4</sup>, Warren C. Ladiges<sup>5</sup>, Laura J. Niedernhofer<sup>6</sup>, Yousin Suh <sup>1,7</sup>, Paul D. Robbins <sup>6</sup> and Jan Vijg<sup>1,8</sup>

---

<sup>1</sup>Department of Genetics, Albert Einstein College of Medicine, New York, NY, USA. <sup>2</sup>Department of Medicine, Albert Einstein College of Medicine, New York, NY, USA. <sup>3</sup>Department of Computational Biology, Weill Institute for Cell and Molecular Biology, Cornell University, New York, NY, USA. <sup>4</sup>Department of Biology, University of Rochester, Rochester, NY, USA. <sup>5</sup>Department of Comparative Medicine, School of Medicine, University of Washington, Seattle, WA, USA. <sup>6</sup>Institute on the Biology of Aging and Metabolism and Department of Biochemistry, Molecular Biology, and Biophysics, University of Minnesota, Minneapolis, MN, USA. <sup>7</sup>Departments of Obstetrics and Gynecology, Genetics and Development, Columbia University, New York, NY, USA. <sup>8</sup>Center for Single-Cell Omics in Aging and Disease, School of Public Health, Shanghai, Jiao Tong University School of Medicine, Shanghai, China.

✉e-mail: [zhengdong.zhang@einsteinmed.org](mailto:zhengdong.zhang@einsteinmed.org)

## Supplementary material

**Supplementary Table 1. Genome-wide association studies of human ageing.**

| Study                   | Ageing-related trait                                                                       | Cohort size and ethnicity                                                                                                                                                                                        | Genome-wide significant variants ( $P < 5E-8$ )                                                                                                                                                                                                                                                                                      | Loci/Genes                                                                                                                                                                                                                                                           | Ref. |
|-------------------------|--------------------------------------------------------------------------------------------|------------------------------------------------------------------------------------------------------------------------------------------------------------------------------------------------------------------|--------------------------------------------------------------------------------------------------------------------------------------------------------------------------------------------------------------------------------------------------------------------------------------------------------------------------------------|----------------------------------------------------------------------------------------------------------------------------------------------------------------------------------------------------------------------------------------------------------------------|------|
| Deelen et al., 2019     | Longevity (cases: > 90th or 99th survival percentile; controls: <60th survival percentile) | 4 discovery cohorts:<br>36,745 (11,262 + 25,483) European, 33,444 (5,662 + 27,782) European and East Asian, 41,610 (13,617 + 27,993) European, East Asian and African American, 28,967 (3,484 + 25,483) European | Discovery from European >90th survival percentile: rs7676745, rs429358, rs7412;<br>Discovery from European >99th survival percentile: rs429358, rs7412;<br>Discovery from trans-ethnic >90th survival percentile: rs2069837, rs429358, rs7412;<br>Discovery from trans-ethnic >99th survival percentile: rs2069837, rs429358, rs7412 | Discovery from European >90th survival percentile: GPR78, APOE;<br>Discovery from European >99th survival percentile: APOE;<br>Discovery from trans-ethnic >90th survival percentile: IL6, APOE;<br>Discovery from trans-ethnic >99th survival percentile: IL6, APOE | 1    |
| Wright et al., 2019     | Parental lifespan                                                                          | 540,852 and 579,931 multiethnic                                                                                                                                                                                  | rs1333042, rs10887623, rs9457925, bp75763624, rs931794, bp45411941                                                                                                                                                                                                                                                                   | ANRIL, WAPL, LPA, SRRM3, CHRNA3/5, APOE                                                                                                                                                                                                                              | 2    |
| Timmers et al., 2019    | Parental lifespan                                                                          | 1 million British/European                                                                                                                                                                                       | rs1230666, rs1275922, rs61348208, rs34967069, rs10455872, rs1556516, rs11065979, rs8042849, rs6224, rs12924886, rs142158911, rs429358, rs4970836, rs6744653, rs10211471, rs111333005, rs113160991, rs56179563, rs2519093                                                                                                             | MAGI3, KCNK3, HTT, HLA-DQA1, LPA, CDKN2B-AS1, ATXN2/BRAP, CHRNA3/5, FURIN/FES, HP, LDLR, APOE, CELSR2/PSRC1, TREM18, GBX2/ASB18, IGF2R, POM121C, ZC3HC1, ABO                                                                                                         | 3    |
| Zeng et al., 2018       | Longevity (cases: >100 years)                                                              | 4,477 (2,178 + 2,299) Han Chinese                                                                                                                                                                                | –                                                                                                                                                                                                                                                                                                                                    | –                                                                                                                                                                                                                                                                    | 4    |
| McDaid et al., 2017     | Parental age of death                                                                      | 116,279 British                                                                                                                                                                                                  | rs10455872, rs1333045, rs951266, rs4420638                                                                                                                                                                                                                                                                                           | LPA, CDKN2BAS, CHRNA5, APOC1                                                                                                                                                                                                                                         | 5    |
| Sebastiani et al., 2017 | Longevity (cases: male>95, female>99)                                                      | 8,329 (2070 + 6259) multiethnic                                                                                                                                                                                  | rs6857, rs769449, rs59007384, rs3764814, rs7976168                                                                                                                                                                                                                                                                                   | APOE, PVRL2, USP42, TMTC2                                                                                                                                                                                                                                            | 6    |
| Pilling et al., 2017    | Parental lifespan                                                                          | 389,166 British/European                                                                                                                                                                                         | rs602633, rs28383322, rs55730499, rs1556516, rs7137828, rs1317286, rs17514846, rs429358, rs1627804, rs7844965, rs61978928, rs28926173, rs146254978, rs139137459, rs3130507, rs131871514, rs61949650, rs3131621, rs13262617, rs61905747, rs74011415, rs12461964                                                                       | CLESR2, PSRC1, HLA-DRB1, HLA-DQA1, LPA, CDKN2B-AS1, SH2B3, ATXN2, CHRNA3, FURIN, APOE, APOC1, BEND3, EPHX2, PROX2, MC2R, FPGT, TNNT3, USP2-AS1, PSORSIC3, B3GALT1, MICA, MICB, TOX, ZW10, SEMA6D, EGLN2, CYP2A6, EXOC3L2, MAPK4, C20orf187, CHRNA4                   | 7    |

|                         |                                                               |                                                                                      |                                                         |                                               |    |
|-------------------------|---------------------------------------------------------------|--------------------------------------------------------------------------------------|---------------------------------------------------------|-----------------------------------------------|----|
| Tanaka et al., 2017     | Parental longevity (cases: mother>91 or father>87)            | 5,716 American (European and African descent)                                        | –                                                       | –                                             | 8  |
| Joshi et al., 2017      | Parental lifespan                                             | 606,059 European and African                                                         | rs34831921, rs55730499, rs8042849, rs429358, rs10198124 | HLA-DQA1, HLA-DRB1, LPA, CHRNA3, CHRNA5, APOE | 9  |
| Pilling et al., 2016    | Parental longevity (cases: mother≥98, father≥95) and lifespan | 42,273 (1,339 + 40,934) 'white' British and 75,244 'white' British                   | rs62227724, rs528161076, rs75824829, rs4709783          | AP5Z1                                         | 10 |
| Zeng et al., 2016       | Longevity (cases: >100)                                       | 4,477 (2,178 + 2,299) Han Chinese                                                    | rs2069837, rs2440012                                    | IL6, ANKRD20A9P                               | 11 |
| Joshi et al., 2016      | Parental mortality                                            | 272,081 British                                                                      | rs10519203, rs429358                                    | CHRNA3/5, APOE                                | 12 |
| Flachsbart et al., 2016 | Longevity (cases: mean age = 99.0)                            | 7,826 (1,458 + 6,368) German                                                         | rs2075650                                               | APOE, TOMM40                                  | 13 |
| Fortney et al., 2015    | Longevity (cases: >95; ≥90)                                   | 2 discovery cohort: 1,715 (801 + 914) Caucasian and 23,451 (7,330 + 16,121) European | rs2075650, rs4420638                                    | APOE, TOMM40                                  | 14 |
| Broer et al., 2015      | Longevity (cases: ≥90)                                        | 9,793 (6,036 + 3,757) Caucasian                                                      | rs1416280                                               | GRIK2                                         | 15 |
| Yashin et al., 2015     | Lifespan                                                      | 679 female and multiethnic                                                           | rs12949468, rs4639950, rs7894051, rs2292664, rs2229188  | TLK2, C1QTNF5, ECHS1, RIMBP2, CYP51A1         | 16 |
| Deelen et al., 2014     | Longevity (cases: ≥85)                                        | 23,850 (7,729 + 16,121) European                                                     | rs2149954, rs4420638                                    | EBF1, APOE                                    | 17 |
| Edwards et al., 2013    | Aging (cases: >80 and successful aging)                       | 263 (74 + 189) Amish                                                                 | –                                                       | –                                             | 18 |
| Sebastiani et al., 2012 | Longevity (cases: ≥95)                                        | 1,715 (801 + 914) Caucasian                                                          | rs2075650                                               | APOE, TOMM40                                  | 19 |
| Deelen et al., 2011     | Longevity (cases: ≥89)                                        | 2,073 (403 + 1,670) European                                                         | rs2075650                                               | APOE, TOMM40                                  | 20 |
| Walter et al., 2011     | Aging (time to event)                                         | 25,007 European                                                                      | –                                                       | –                                             | 21 |
| Malovini et al., 2011   | Longevity (cases: >90)                                        | 963 (410 + 553) European                                                             | –                                                       | –                                             | 22 |
| Nebel et al., 2011      | Longevity (cases: >94)                                        | 1,848 (763 + 1,085) European                                                         | rs4420638                                               | APOC1                                         | 23 |
| Newman et al., 2010     | Longevity (cases: >90)                                        | 3,791 (1,836 + 1,955) European                                                       | –                                                       | –                                             | 24 |

|                      |                                                 |                                                 |            |       |    |
|----------------------|-------------------------------------------------|-------------------------------------------------|------------|-------|----|
| Yashin et al., 2010  | Lifespan                                        | 1,173 multiethnic                               | –          | –     | 25 |
| Poduslo et al., 2010 | Aging (cases: >79;<br>controls: AD<br>patients) | 316 (89 + 227) European<br>and African American | rs12474609 | LRP1B | 26 |

Notes: For case-control studies, the age criteria for cases are included in the parentheses and the cohort size is shown as 'the total number of samples (the number of cases + the number of controls)'.

**Supplementary Table 2. Independent loci with significant longevity- or lifespan-association. #**

| <i>N</i> 1 † | <i>N</i> 2 ‡ | Locus (SNP ID) | Chr. | Position (hg38) | LD in <i>R</i> <sup>2</sup> , all population § | References | In Figure 2? Reasons if not       |
|--------------|--------------|----------------|------|-----------------|------------------------------------------------|------------|-----------------------------------|
| 1            |              | rs146254978    | 1    | 74402115        |                                                | 7          | Small study                       |
| 2            | 1            | rs602633       | 1    | 109278889       | See Supplementary Table 2.2                    | 7          | Non-independent SNP               |
|              |              | rs4970836      | 1    | 109279175       |                                                | 3          | Yes                               |
| 3            |              | rs1230666      | 1    | 113630788       |                                                | 3          | Yes                               |
| 4            |              | rs6744653      | 2    | 628524          |                                                | 3          | Yes                               |
| 5            |              | rs1275922      | 2    | 26710019        |                                                | 3          | Yes                               |
| 6            |              | rs10198124     | 2    | 35216373        |                                                | 9          | Beta not available                |
| 7            |              | rs12474609     | 2    | 140963573       |                                                | 26         | Small study                       |
| 8            |              | rs10211471     | 2    | 236173211       |                                                | 3          | Yes                               |
| 9            |              | rs61348208     | 4    | 3087837         |                                                | 3          | Yes                               |
| 10           |              | rs7676745      | 4    | 8563820         |                                                | 1          | Yes                               |
| 11           |              | rs2149954      | 5    | 158393594       |                                                | 17         | Yes                               |
| 12           |              | rs3130507      | 6    | 31179699        |                                                | 7          | Different effect size measurement |
| 13           |              | rs3131621      | 6    | 31457722        |                                                | 7          | Different effect size measurement |
| 14           | 2            | rs34831921     | 6    | 32622991        | See Supplementary Table 2.14                   | 9          | Non-independent SNP               |
|              |              | rs34967069     | 6    | 32623471        |                                                | 3          | Yes                               |
|              |              | rs28383322     | 6    | 32625019        |                                                | 7          | Non-independent SNP               |
| 15           |              | rs1416280      | 6    | 102438768       |                                                | 15         | Small study                       |
| 16           |              | rs1627804      | 6    | 107079224       |                                                | 7          | Different effect size measurement |
| 17           |              | rs111333005    | 6    | 160066164       |                                                | 3          | Yes                               |
| 18           |              | rs9457925      | 6    | 160427711       |                                                | 2          | Yes                               |
| 19           | 3            | rs55730499     | 6    | 160584578       | See Supplementary Table 2.19                   | 7,9        | Non-independent SNP               |
|              |              | rs10455872     | 6    | 160589086       |                                                | 3,5        | Yes                               |
| 20           |              | rs4709783      | 6    | 163874119       |                                                | 10         | Yes                               |
| 21           |              | rs528161076    | 7    | 4787884         |                                                | 10         | Yes                               |
| 22           |              | rs3764814      | 7    | 6150149         |                                                | 6          | Small study                       |
| 23           | 4            | rs2069837      | 7    | 22728408        |                                                | 1,11       | Yes                               |
| 24           |              | rs113160991    | 7    | 75465064        |                                                | 3          | Yes                               |
| 25           |              | rs28689051     | 7    | 76134306        |                                                | 2          | Yes                               |
| 26           |              | rs2229188      | 7    | 92134309        |                                                | 16         | Small study                       |
| 27           |              | rs56179563     | 7    | 130045757       |                                                | 3          | Yes                               |
| 28           |              | rs13262617     | 8    | 58925574        |                                                | 7          | Different effect size measurement |
| 29           | 5            | rs1556516      | 9    | 22100177        | See Supplementary Table 2.29                   | 3,7        | Yes                               |

|    |   |              |    |           |                              |             |                                   |
|----|---|--------------|----|-----------|------------------------------|-------------|-----------------------------------|
|    |   | rs1333042    | 9  | 22103814  |                              | 2           | Non-independent SNP               |
|    |   | rs1333045    | 9  | 22119196  |                              | 5           | Non-independent SNP               |
| 30 |   | rs2519093    | 9  | 133266456 |                              | 3           | Yes                               |
| 31 |   | rs75824829   | 9  | 135376756 |                              | 10          | Yes                               |
| 32 |   | rs10887623   | 10 | 86555424  |                              | 2           | Yes                               |
| 33 |   | rs7894051    | 10 | 133370917 |                              | 16          | Small study                       |
| 34 |   | rs61905747   | 11 | 113769120 |                              | 7           | Different effect size measurement |
| 35 |   | rs4639950    | 11 | 119345845 |                              | 16          | Small study                       |
| 36 |   | rs139137459  | 11 | 119399248 |                              | 7           | Yes                               |
| 37 |   | rs7976168    | 12 | 83044780  |                              | 6           | Different effect size measurement |
| 38 | 6 | rs7137828    | 12 | 111494996 | See Supplementary Table 2.38 | 7           | Non-independent SNP               |
|    |   | rs11065979   | 12 | 111621753 |                              | 3           | Yes                               |
| 39 |   | rs2292664    | 12 | 130437119 |                              | 16          | Small study                       |
| 40 |   | rs2440012    | 13 | 18865983  |                              | 11          | Small study                       |
| 41 |   | rs1043332229 | 13 | 31297377  |                              | 7           | Different effect size measurement |
| 42 |   | rs61949650   | 13 | 64262356  |                              | 7           | Different effect size measurement |
| 43 |   | rs61978928   | 14 | 74855011  |                              | 7           | Different effect size measurement |
| 44 |   | rs74011415   | 15 | 47367997  |                              | 7           | Different effect size measurement |
| 45 | 7 | rs10519203   | 15 | 78521704  | See Supplementary Table 2.45 | 12          | Non-independent SNP               |
|    |   | rs8042849    | 15 | 78525587  |                              | 3,9         | Yes                               |
|    |   | rs931794     | 15 | 78533838  |                              | 2           | Non-independent SNP               |
|    |   | rs951266     | 15 | 78586199  |                              | 5           | Non-independent SNP               |
|    |   | rs1317286    | 15 | 78603787  |                              | 7           | Non-independent SNP               |
| 46 |   | rs17514846   | 15 | 90873320  |                              | 7           | Different effect size measurement |
| 47 |   | rs6224       | 15 | 90880313  |                              | 3           | Yes                               |
| 48 |   | rs12924886   | 16 | 72041694  |                              | 3           | Yes                               |
| 49 |   | rs12949468   | 17 | 62516455  |                              | 16          | Small study                       |
| 50 |   | rs28926173   | 18 | 13886720  |                              | 7           | Yes                               |
| 51 |   | rs142158911  | 19 | 11079858  |                              | 3           | Yes                               |
| 52 |   | rs12461964   | 19 | 40835324  |                              | 7           | Different effect size measurement |
| 53 | 8 | rs6857       | 19 | 44888997  | See Supplementary Table 2.53 | 6           | Non-independent SNP               |
|    |   | rs2075650    | 19 | 44892362  |                              | 14,19,20,27 | Non-independent SNP               |
|    |   | rs59007384   | 19 | 44893408  |                              | 6           | Non-independent SNP               |
|    |   | rs769449     | 19 | 44906745  |                              | 6           | Non-independent SNP               |
|    |   | rs429358     | 19 | 44908684  |                              | 1-3,7,9,12  | Yes                               |

|    |  |            |    |          |  |            |                                   |
|----|--|------------|----|----------|--|------------|-----------------------------------|
|    |  | rs7412     | 19 | 44908822 |  | 1          | Yes                               |
|    |  | rs4420638  | 19 | 44919689 |  | 5,14,17,23 | Non-independent SNP               |
| 54 |  | rs74444983 | 19 | 45242349 |  | 7          | Different effect size measurement |
| 55 |  | rs62227724 | 22 | 44128027 |  | 10         | Yes                               |

Notes:

# Among 72 SNPs listed in Supplementary Table 1.

† The index of independent longevity-associated loci.

‡ The index of independent longevity-associated loci that have been replicated in multiple studies.

§ LD among multiple associated SNPs in a locus.

**Supplementary Table 2.2. LD in  $R^2$ .**

|           |          |
|-----------|----------|
|           | rs602633 |
| rs4970836 | 0.9584   |

**Supplementary Table 2.14. LD in  $R^2$ .**

|            |            |            |            |
|------------|------------|------------|------------|
|            | rs34831921 | rs34967069 | rs28383322 |
| rs34831921 | -          | 0.9658     | 0.4096     |
| rs34967069 |            | -          | 0.4        |
| rs28383322 |            |            | -          |

**Supplementary Table 2.19. LD in  $R^2$ .**

|            |            |
|------------|------------|
|            | rs10455872 |
| rs55730499 | 0.8122     |

**Supplementary Table 2.29. LD in  $R^2$ .**

|           |           |           |           |
|-----------|-----------|-----------|-----------|
|           | rs1556516 | rs1333042 | rs1333045 |
| rs1556516 | -         | 0.9936    | 0.3548    |
| rs1333042 |           | -         | 0.3549    |
| rs1333045 |           |           | -         |

**Supplementary Table 2.38. LD in  $R^2$ .**

|           |            |
|-----------|------------|
|           | rs11065979 |
| rs7137828 | 0.9041     |

**Supplementary Table 2.45. LD in  $R^2$ .**

|            |            |           |          |          |           |
|------------|------------|-----------|----------|----------|-----------|
|            | rs10519203 | rs8042849 | rs931794 | rs951266 | rs1317286 |
| rs10519203 | -          | 0.7819    | 0.5168   | 0.447    | 0.3315    |
| rs8042849  |            | -         | 0.3848   | 0.3539   | 0.2528    |
| rs931794   |            |           | -        | 0.4623   | 0.3305    |
| rs951266   |            |           |          | -        | 0.6688    |
| rs1317286  |            |           |          |          | -         |

**Supplementary Table 2.53. LD in  $R^2$ .**

|            |        |           |            |          |          |        |           |
|------------|--------|-----------|------------|----------|----------|--------|-----------|
|            | rs6857 | rs2075650 | rs59007384 | rs769449 | rs429358 | rs7412 | rs4420638 |
| rs6857     | -      | 0.4919    | 0.3253     | 0.4701   | 0.2739   | 0.0066 | 0.2117    |
| rs2075650  |        | -         | 0.3348     | 0.4296   | 0.1973   | 0.002  | 0.1428    |
| rs59007384 |        |           | -          | 0.195    | 0.1377   | 0.1083 | 0.1193    |
| rs769449   |        |           |            | -        | 0.3859   | 0.0056 | 0.3076    |
| rs429358   |        |           |            |          | -        | 0.0139 | 0.3387    |
| rs7412     |        |           |            |          |          | -      | 0.0037    |
| rs4420638  |        |           |            |          |          |        | -         |

## References

- 1 Deelen, J. *et al.* A meta-analysis of genome-wide association studies identifies multiple longevity genes. *Nat Commun* **10**, 3669, doi:10.1038/s41467-019-11558-2 (2019).
- 2 Wright, K. M. *et al.* A Prospective Analysis of Genetic Variants Associated with Human Lifespan. *G3 (Bethesda)* **9**, 2863-2878, doi:10.1534/g3.119.400448 (2019).
- 3 Timmers, P. R. *et al.* Genomics of 1 million parent lifespans implicates novel pathways and common diseases and distinguishes survival chances. *Elife* **8**, doi:10.7554/eLife.39856 (2019).
- 4 Zeng, Y. *et al.* Sex Differences in Genetic Associations With Longevity. *JAMA Netw Open* **1**, doi:10.1001/jamanetworkopen.2018.1670 (2018).
- 5 McDaid, A. F. *et al.* Bayesian association scan reveals loci associated with human lifespan and linked biomarkers. *Nat Commun* **8**, 15842, doi:10.1038/ncomms15842 (2017).
- 6 Sebastiani, P. *et al.* Four Genome-Wide Association Studies Identify New Extreme Longevity Variants. *J Gerontol A Biol Sci Med Sci* **72**, 1453-1464, doi:10.1093/gerona/glx027 (2017).
- 7 Pilling, L. C. *et al.* Human longevity: 25 genetic loci associated in 389,166 UK biobank participants. *Aging (Albany NY)* **9**, 2504-2520, doi:10.18632/aging.101334 (2017).
- 8 Tanaka, T. *et al.* Genome-wide Association Study of Parental Life Span. *J Gerontol A Biol Sci Med Sci* **72**, 1407-1410, doi:10.1093/gerona/glw206 (2017).
- 9 Joshi, P. K. *et al.* Genome-wide meta-analysis associates HLA-DQA1/DRB1 and LPA and lifestyle factors with human longevity. *Nat Commun* **8**, 910, doi:10.1038/s41467-017-00934-5 (2017).
- 10 Pilling, L. C. *et al.* Human longevity is influenced by many genetic variants: evidence from 75,000 UK Biobank participants. *Aging (Albany NY)* **8**, 547-560, doi:10.18632/aging.100930 (2016).
- 11 Zeng, Y. *et al.* Novel loci and pathways significantly associated with longevity. *Sci Rep* **6**, 21243, doi:10.1038/srep21243 (2016).
- 12 Joshi, P. K. *et al.* Variants near CHRNA3/5 and APOE have age- and sex-related effects on human lifespan. *Nat Commun* **7**, 11174, doi:10.1038/ncomms11174 (2016).
- 13 Flachsbart, F. *et al.* Immunochip analysis identifies association of the RAD50/IL13 region with human longevity. *Aging Cell* **15**, 585-588, doi:10.1111/accel.12471 (2016).
- 14 Fortney, K. *et al.* Genome-Wide Scan Informed by Age-Related Disease Identifies Loci for Exceptional Human Longevity. *PLoS Genet* **11**, e1005728, doi:10.1371/journal.pgen.1005728 (2015).
- 15 Broer, L. *et al.* GWAS of longevity in CHARGE consortium confirms APOE and FOXO3 candidacy. *J Gerontol A Biol Sci Med Sci* **70**, 110-118, doi:10.1093/gerona/glu166 (2015).
- 16 Yashin, A. I. *et al.* Genetics of aging, health, and survival: dynamic regulation of human longevity related traits. *Front Genet* **6**, 122, doi:10.3389/fgene.2015.00122 (2015).
- 17 Deelen, J. *et al.* Genome-wide association meta-analysis of human longevity identifies a novel locus conferring survival beyond 90 years of age. *Hum Mol Genet* **23**, 4420-4432, doi:10.1093/hmg/ddu139 (2014).
- 18 Edwards, D. R. *et al.* Linkage and association of successful aging to the 6q25 region in large Amish kindreds. *Age (Dordr)* **35**, 1467-1477, doi:10.1007/s11357-012-9447-1 (2013).
- 19 Sebastiani, P. *et al.* Genetic signatures of exceptional longevity in humans. *PLoS One* **7**, e29848, doi:10.1371/journal.pone.0029848 (2012).
- 20 Deelen, J. *et al.* Genome-wide association study identifies a single major locus contributing to survival into old age; the APOE locus revisited. *Aging Cell* **10**, 686-698, doi:10.1111/j.1474-9726.2011.00705.x (2011).
- 21 Walter, S. *et al.* A genome-wide association study of aging. *Neurobiol Aging* **32**, 2109 e2115-2128, doi:10.1016/j.neurobiolaging.2011.05.026 (2011).



- 22 Malovini, A. *et al.* Association study on long-living individuals from Southern Italy identifies rs10491334 in the CAMKIV gene that regulates survival proteins. *Rejuvenation Res* **14**, 283-291, doi:10.1089/rej.2010.1114 (2011).
- 23 Nebel, A. *et al.* A genome-wide association study confirms APOE as the major gene influencing survival in long-lived individuals. *Mech Ageing Dev* **132**, 324-330, doi:10.1016/j.mad.2011.06.008 (2011).
- 24 Newman, A. B. *et al.* A meta-analysis of four genome-wide association studies of survival to age 90 years or older: the Cohorts for Heart and Aging Research in Genomic Epidemiology Consortium. *J Gerontol A Biol Sci Med Sci* **65**, 478-487, doi:10.1093/gerona/gdq028 (2010).
- 25 Yashin, A. I., Wu, D., Arbeev, K. G. & Ukraintseva, S. V. Joint influence of small-effect genetic variants on human longevity. *Aging (Albany NY)* **2**, 612-620, doi:10.18632/aging.100191 (2010).
- 26 Poduslo, S. E., Huang, R. & Spiro, A., 3rd. A genome screen of successful aging without cognitive decline identifies LRP1B by haplotype analysis. *Am J Med Genet B Neuropsychiatr Genet* **153B**, 114-119, doi:10.1002/ajmg.b.30963 (2010).
- 27 Flachsbart, F. *et al.* Identification and characterization of two functional variants in the human longevity gene FOXO3. *Nat Commun* **8**, 2063, doi:10.1038/s41467-017-02183-y (2017).
